# Supplementary material
Source: PubMed Central journal article supplement (PMC3271931)
Supplement: 1109173109_pnas.201109173SI.pdf [file 1109173109_pnas.201109173SI.pdf]

# Supporting Information

Miles et al. 10.1073/pnas.1109173109

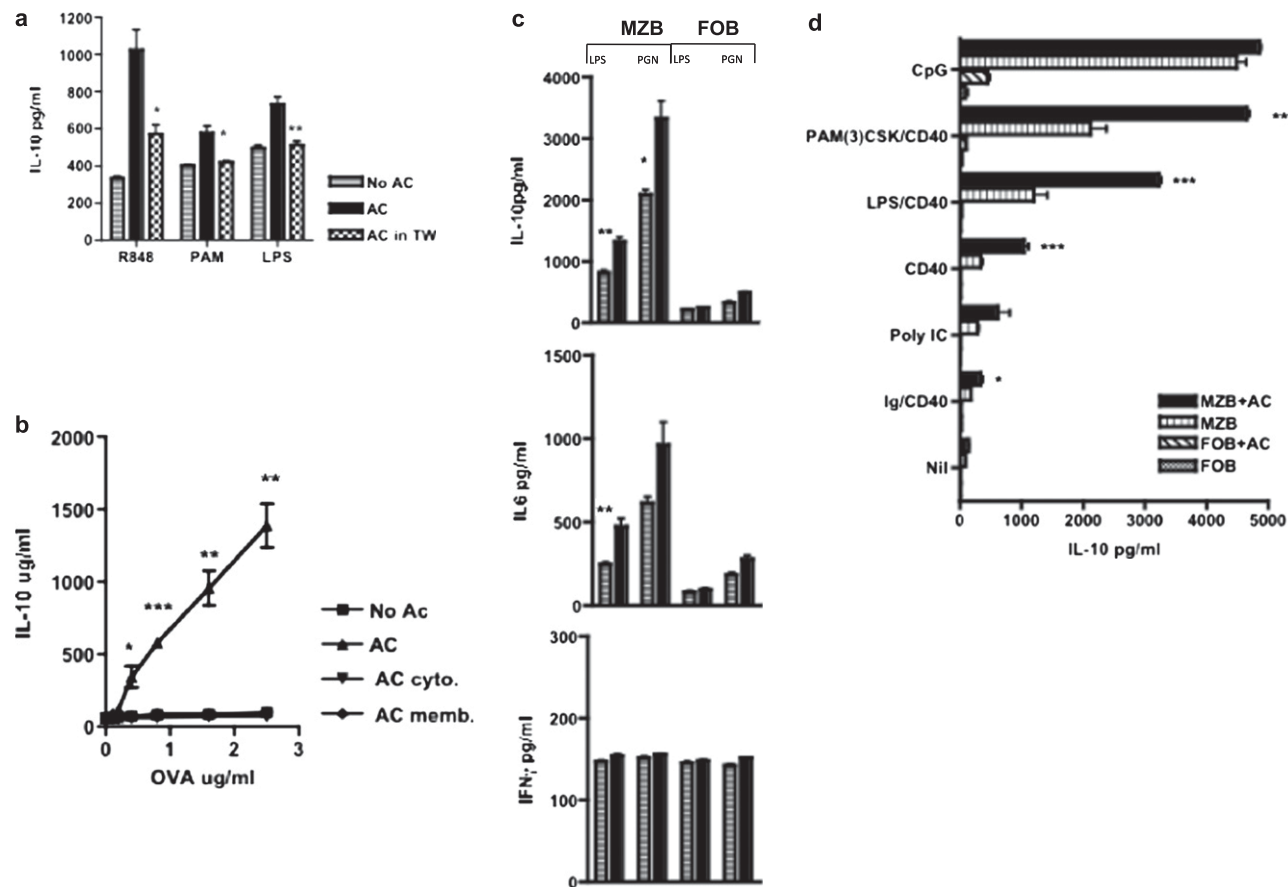

Fig. S1. (Continued)

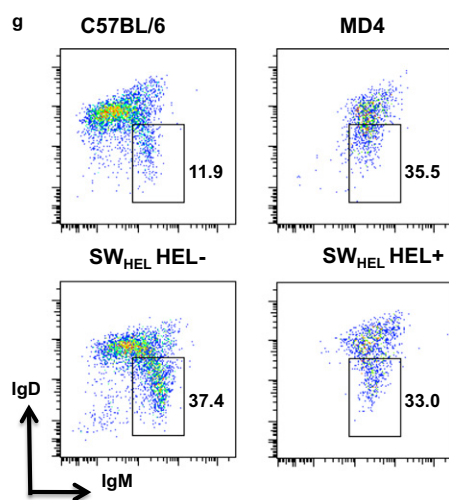



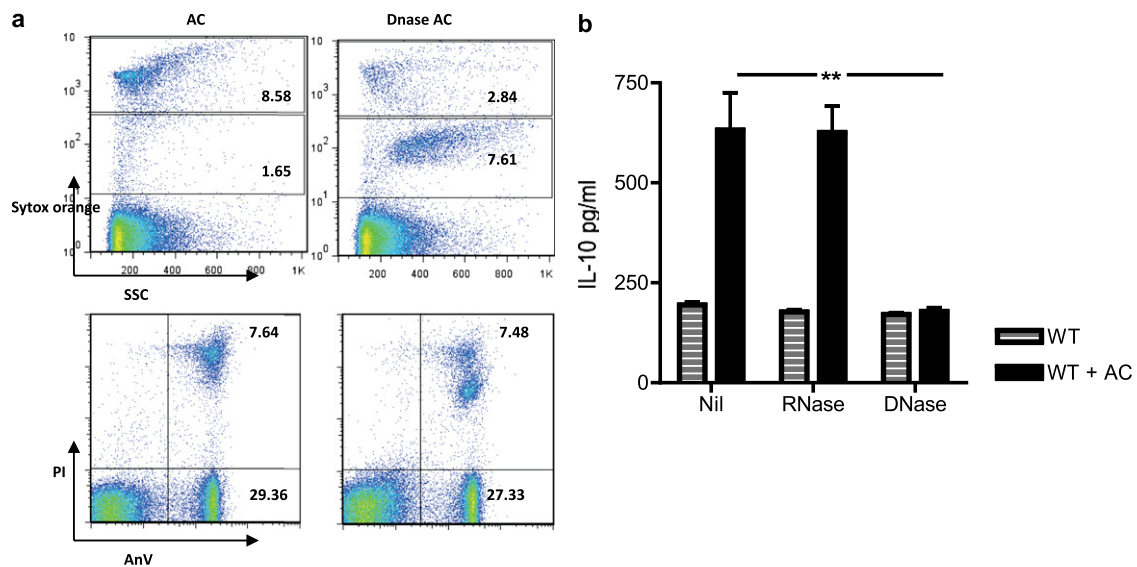

**Fig. S2.** (A) (Upper) ACs were stained with Sytox orange and DNase, resulting in decreased Sytox staining of DNA by a log order. (Lower) ACs treated with DNase were stained with annexin V and PI. Just slightly more than 7% of the cells were PI positive, accounting for the residual Sytox staining shown in the upper panel. (B) MZB cells were cocultured with ovalbumin (OVA)-specific T cells with or without ACs and treated with RNase or DNase for 72 h, after which IL-10 was measured.

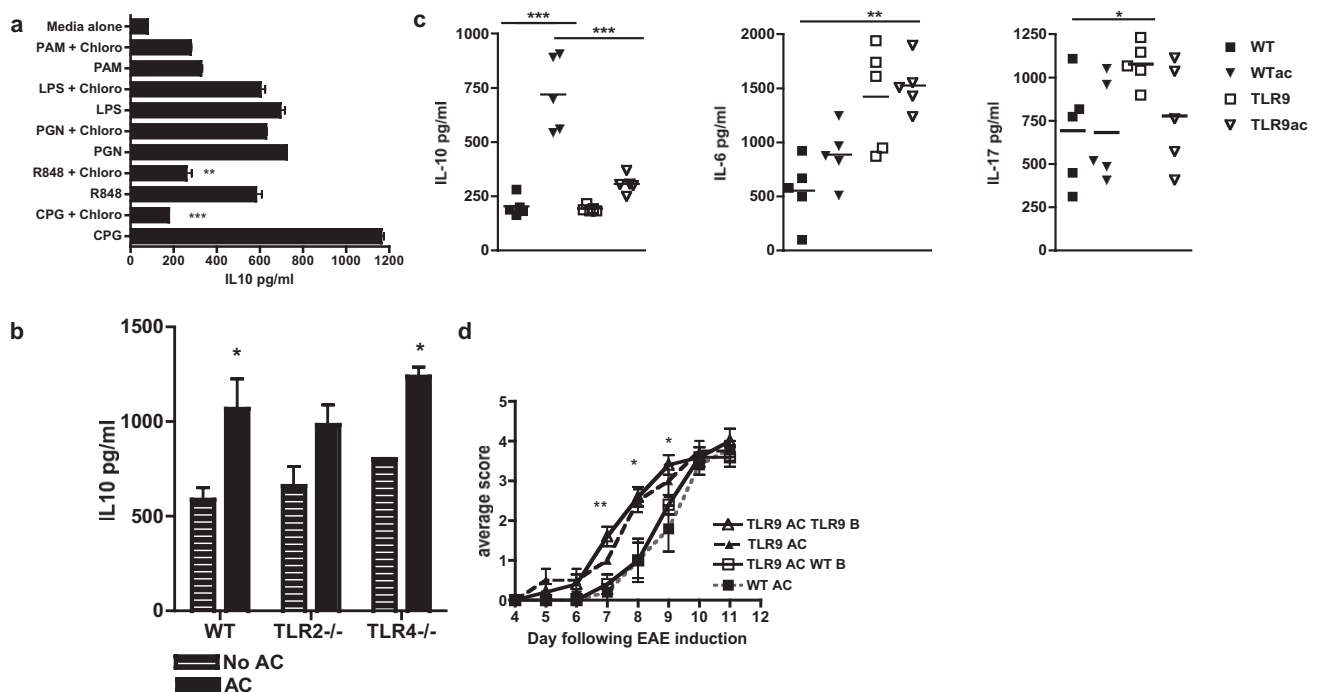

**Fig. S3.** (A) B cells were stimulated with various TLR ligands, including TLR1/2 with PAM(3)CSK, TLR2 (PGN), TLR4 (LPS), TLR7 (R848), and TLR9 (CpG), in the presence and absence of chloroquine. Secretion of IL-10 was inhibited only after TLR7 and TLR9 stimulation. (B) WT, TLR2-deficient, and TLR4-deficient B cells were cocultured with ACs, OVA-specific T cells, and OVA peptide at 2  $\mu$ g/mL in vitro. After 72 h, IL-10 secretion was measured by ELISA. (C) At the end of the clinical experiment shown in Fig. 3D, splenocytes were isolated and restimulated with myelin oligodendrocyte glycoprotein peptide, and IL-10, IL-17, and IL-6 secretion were measured. Error bars represent SEM. \*\*\* $P \leq 0.0004$ ; \*\* $P \leq 0.004$ ; \* $P \leq 0.04$ . (D) The same experiment as shown in Fig. 3D, but with the additional control of TLR9<sup>-</sup> B cells added, which provided no additional protection. Error bars represent SEM. \*\*\* $P \leq 0.0004$ ; \*\* $P \leq 0.004$ ; \* $P \leq 0.04$ .
